# Supplementary material for: Application and observation of hemostatic effect of independently developed hemostatic equipment in a lethal swine exsanguination model
Source: Research Square preprint supplement (doi:10.21203/rs.3.rs-7037208/v1), 2025-07-18
Supplement: Supplementary file 1 [file a9561c34690cd32fbdb09a09.docx]

**Application and observation of hemostatic effect of independently developed hemostatic equipment in a lethal swine exsanguination model**

Huijuan Fu1，Ye Tang1，Mingjian Bei2,3，Yangyang Wu4, Yehui Lu4, Yanhua Wang1，Liu Zhang5，Dianying Zhang1

1→Department of Trauma and Orthopedics, Peking University People's Hospital, National Center for Trauma Medicine, Key Laboratory of Ministry of Education for Trauma Treatment and Nerve Regeneration, Beijing 100044, China.

2→National Center for Orthopaedics.

3→Department of Orthopaedic Trauma, Beijing Jishuitan Hospital, Capital Medical University, Beijing 100035, China.

4→Yunnan Baiyao Group Co., Ltd, Yunnan 650500, China.

5→National Center for Emergency Medical Research；Emergency General hospital, Beijing 100028, China.

Corresponding author: Dianying Zhang, Email：[zdy8016@163.com](mailto:zdy8016@163.com).

**Fund Program**: National Key Research and Development Program (2022YFC3006200, 2022YFC3006204, 2022YFC3006205) ’

**Conflict of Interest**：The authors declare no conflict of interest.

**Declaration**:

Clinical trial number: not applicable.

Ethics, Consent to Participate, and Consent to Publish declarations: not applicable.

# Abstract

**Objective**: Severe hemorrhage is a predominant cause of death among trauma patients. Conventional techniques often prove insufficient for hemostasis in junctional injuries. Therefore, this study independently developed a disposable sterile hemostatic clamp. A swine groin model was utilized to evaluate its efficacy.

**Methods**: 10 healthy Bama Xiang boars aged 6-7 months were divided to two groups. After femoral artery incision, the control group were treated with bandages and the experimental group were treated with hemostatic clamps. The survival rate, survival time, hemostatic operation time, and blood loss were recorded. Local joints were repeatedly flexed to assess the stability. Physiological parameters were monitored and recorded. Ultrasound was used to observe blood flow perfusion. Local skin was examined and femoral arteries were taken for pathological staining.

**Results**: In experimental group and control group, all 5 (100%) and 3 (60%) animals survived, respectively. The survival time of experimental group was all >180 min, the median survival time and interquartile range of control group were 180 min and 68 min. The hemostatic procedures time were 22.50±2.89 min and 57.25±13.60 min, and blood loss were 190±100 g and 549±195 g, respectively. Ultrasound showed the clamp effectively reduced distal arterial blood flow. It was well-fixed after joint movement, while bandages were loose. No skin damage was observed. Femoral artery in experimental group showed intravascular thrombosis, while no thrombosis in control.

**Conclusion**: Compared to traditional bandaging, the hemostatic clamp can significantly reduce blood loss and maintain stable vital signs, demonstrating its potential in controlling severe pre-hospital hemorrhage.

# Keywords

hemorrhage, hemostasis, medical apparatus, initial medical intervention, traumatic injuries, wound management.

# Key Points

**Question**: This study evaluated an independently developed hemostatic clamp’s efficacy in controlling severe junctional hemorrhage compared to traditional bandaging in a swine femoral artery injury model.

**Findings**: In a randomized swine model, the hemostatic clamp reduced blood loss (190 ± 100 g vs. 549 ± 195 g, p < 0.05) and hemostatic operation time (22.50 ± 2.89 s vs. 57.25 ± 13.60 s, p < 0.05) and sustained stable vital signs (p < 0.05) versus bandaging.

**Meaning**: The hemostatic clamp is a rapid, effective and stable device without secondary injury for junctional hemorrhage, with potential to improve pre-hospital trauma care and reduce mortality.

# Introduction

Trauma has emerged as a critical public health concern worldwide (1). It can result in massive blood loss and may lead to hemorrhagic shock, with the median interval of only two hours from shock onset to death. Excessive blood loss has been identified as the primary contributor to "preventable death" among trauma patients (2, 3). Consequently, whether in military or civilian settings, it is imperative to manage bleeding following hemorrhage rapidly and effectively, as this is essential to prevent hemorrhagic shock and death (4). Hemostasis is a fundamental component of trauma management. The "Tactical Combat Casualty Care Guidelines", which represent the standard for frontline trauma care in the U.S. military, prioritized hemostasis as the foremost treatment objective. These guidelines established a range of hemostatic strategies and underscored the importance of advancing techniques and equipment (5).

Hemostatic devices play a crucial role in managing life-threatening hemorrhage resulting from traumatic injuries (6). Commonly employed hemostatic interventions are mainly tourniquets, hemostatic dressings, hemostatic agents and tranexamic acid. Nevertheless, each presents certain limitations. For instance, while tourniquets are effective in controlling hemorrhage in limbs (7, 8), their application becomes challenging in anatomically complex regions such as axilla, groin, neck, etc. Studies have demonstrated that the hemostatic efficacy of hemostatic dressings was not superior to that of conventional gauze under pressure (9, 10). Additionally, hemostatic agents may introduce safety concerns. For example, zeolite-based formulations can induce exothermic reactions, resulting in thermal burns, and certain agents with inadequate biocompatibility or that are difficult to degrade may complicate wound management and pose embolism risk (11-15). Furthermore, hemostatic agents typically require sustained manual pressure for several minutes after application to the wound to take effect, which reduces treatment efficiency. Moreover, these agents require high storage conditions, which may limit their utility in extreme environments. Although randomized controlled trials have indicated that the early administration of tranexamic acid can significantly decrease patients’ overall mortality rates (16-18), it is ineffective in preventing hemorrhage from major vessels at junctional injuries. These deficiencies significantly limit the application of the aforementioned hemostatic strategies.

Controlling hemorrhage at junctional sites has always been a major challenge, even for trained emergency and medical personnel, particularly in pre-hospital environments (19). Consequently, extensive research has been conducted globally on junctional hemorrhage. Considerable human, material and financial resources have been invested to improve hemorrhage control methods and develop innovative hemostatic technologies and devices, intending to improve efficacy and reduce mortality and disability rates (20). Currently, a variety of specialized hemostatic devices have been introduced to market, including Abdominal Aortic Junctional Tourniquet (AAJT) (21), Combat Ready Clamp (CRoC) (22), Junctional Emergency Treatment Tool (JETT) (23), SAM Junctional Tourniquet (SJT) (24) and iTClamp 50 (25), all of which have received approval from the U.S. Food and Drug Administration. Despite their designs and applications are different, these devices primarily function by applying direct or indirect pressure to the bleeding site or proximal area to achieve hemostasis. However, these hemostatic devices are not available for purchase, and there are no comparable products. In contrast to developed countries, developing countries' advancement in the research and development of hemostatic devices for traumatic injuries has been relatively slow, resulting in a limited range of emergency hemostatic equipment. The devices currently utilized are mainly tourniquets, elastic bandages, triangular bandages and hemostatic dressings, but there is no specific device designed for trunk and junctional areas. Furthermore, imported hemostatic products are not only costly but also in short supply, hindering the ability to adequately address the demand for trauma hemorrhage treatment. This situation has led to relatively outdated treatment techniques for traumatic hemorrhage.

Based on current situation, there is an urgent need to develop a safe and effective emergency hemostatic device suitable for application at trunk and torso junctions. This device should be user-friendly, easily disassembled and robustly stable to facilitate timely pre-hospital treatment. Therefore, the primary objective of this study is to independently design and develop a temporary wound closure and pressure hemostatic device, called hemostatic clamp, and to validate its effectiveness specifically for managing hemorrhage from open wounds located in compressible areas at trunk and torso junctions.. The Bama Xiang pigs were utilized as the experimental model, and a massive hemorrhage model was established through incision of the femoral artery and partial resection of the upper muscle, to preliminarily assess the efficacy of the hemostatic clamp in controlling external bleeding resulting from significant vascular injuries in groin.

# Materials and Methods

During the course of the experiment, a team of veterinarians and veterinary technicians was responsible for monitoring the animals. Inclusion criteria: 1) healthy Bama miniature pigs; 2) age: 6 to 7 months; 3) weight: 30 to 35 kilograms. Animals were procured from the Beijing Fuhao Laboratory Animal Breeding Center (Beijing, China). Exclusion criteria: The animal with abnormal vital signs after anesthesia.

## Ethical Statement

Animal experiments were conducted in accordance with the ARRIVE 2.0 guidelines (26)(Supplemental Digital Content, Supplementary Data 1). All experimental protocols were approved by the Animal Welfare and Ethics Committee of Hygea Medical Technology Co., Ltd. (Approval No.: PZ250102-W01).

## Research Design

A total of ten swine were randomly assigned to two groups: the experimental group and the control group (n = 5). The experimental group were treated with hemostatic clamps and the control group were treated with bandages to stop bleeding. The primary endpoints measured were survival and survival time. Secondary endpoints measured were blood loss and vital signs (heart rate, blood pressure, and oxygen saturation). Post-hemostasis evaluations comprised peri-wound assessment and histological examination of the femoral artery via hematoxylin-eosin (HE) staining to determine procedural prognosis. The entire experimental protocol adhered to the "3R" principles of animal research (Replacement, Reduction, and Refinement). This experiment was limited to 5 animals per treatment group since a power analysis indicated that 5 animals were enough to provide statistical relevance and would reduce the number of animals used (α = 0.05, d = 1.37 (27), power = 0.93).

## Model and Animal Preparation

The animals underwent a standard fasting period of 12 hours before the experiment. On the day of procedure, anesthesia was induced via intramuscular injection of tiletamine and zolazepam (Zoletil 100, Virbac) at a dosage ranging from 0.5 to 1 ml/kg. Following successful anesthesia induction, the animals were weighed and venous access was established in the auricular vein to facilitate the infusion of crystalloid fluids at a rate of 5-10 ml/kg/h. After preparing the skin, the animals were positioned supine on the surgical table, with a urine pad placed beneath them. A percutaneous puncture of the carotid artery was conducted to insert a pressure monitoring catheter, enabling continuous monitoring of arterial blood pressure. Subsequently, endotracheal intubation was performed and anesthesia was sustained with isoflurane at concentrations between 1-4%. Vasoactive drugs were not administered throughout the procedure. Mechanical ventilation was set to deliver a tidal volume of 5-7 ml/kg and 10-15 breaths per minute, ensuring that end-tidal carbon dioxide (CO2) levels were maintained at 40±5 mmHg. An electrocardiogram monitor (Philips G40E) was utilized to continuously assess vital signs, and only animals with normal blood pressure and heart rate were permitted for subsequent experiments.

The massive hemorrhage model, resulting from injury at groin junction, was established through an incision in the femoral artery and the resection of adjacent muscle tissue. The subject was positioned supine, and the pulse of the femoral artery was palpated. A scalpel was employed to create an incision in the skin approximately 4-5 cm superior to the artery, followed by a meticulous layer-by-layer dissection. The muscle tissue above the artery was partially excised to reveal the femoral artery and establish a localized cavity defect. The femoral artery was dissected over a length of 3-4 cm and treated with 2% lidocaine to mitigate vascular spasm. Vascular clamps were applied to both the proximal and distal ends of the femoral artery, and a 6 mm incision was made in the artery while preserving the integrity of the posterior wall to prevent retraction. Start timing from free bleeding, allowing free bleeding for 30 seconds to stimulate the on-site environment, then hemostatic interventions were preformed (28). An appropriate amount of gauze was filled into the arterial injury and cavity defect. Place the pressuring airbag between the gauze layers in order to inflate it to enhance the compression force and help to stop bleeding. Wound was treated with hemostatic clamps in experimental group. Hemostatic clamp was opened and secured on the outer edge of the wound and the skin around the wound is retracted inward by closing the clamp, thereby facilitating wound closure. In the control group, the wound was packed with elastic bandages to apply pressure followed by manual pressure for an additional 3 minutes. After 3 mins of manual pressure, the pressure was stopped without removing the bandage. No additional treatment was performed (Figure 1).
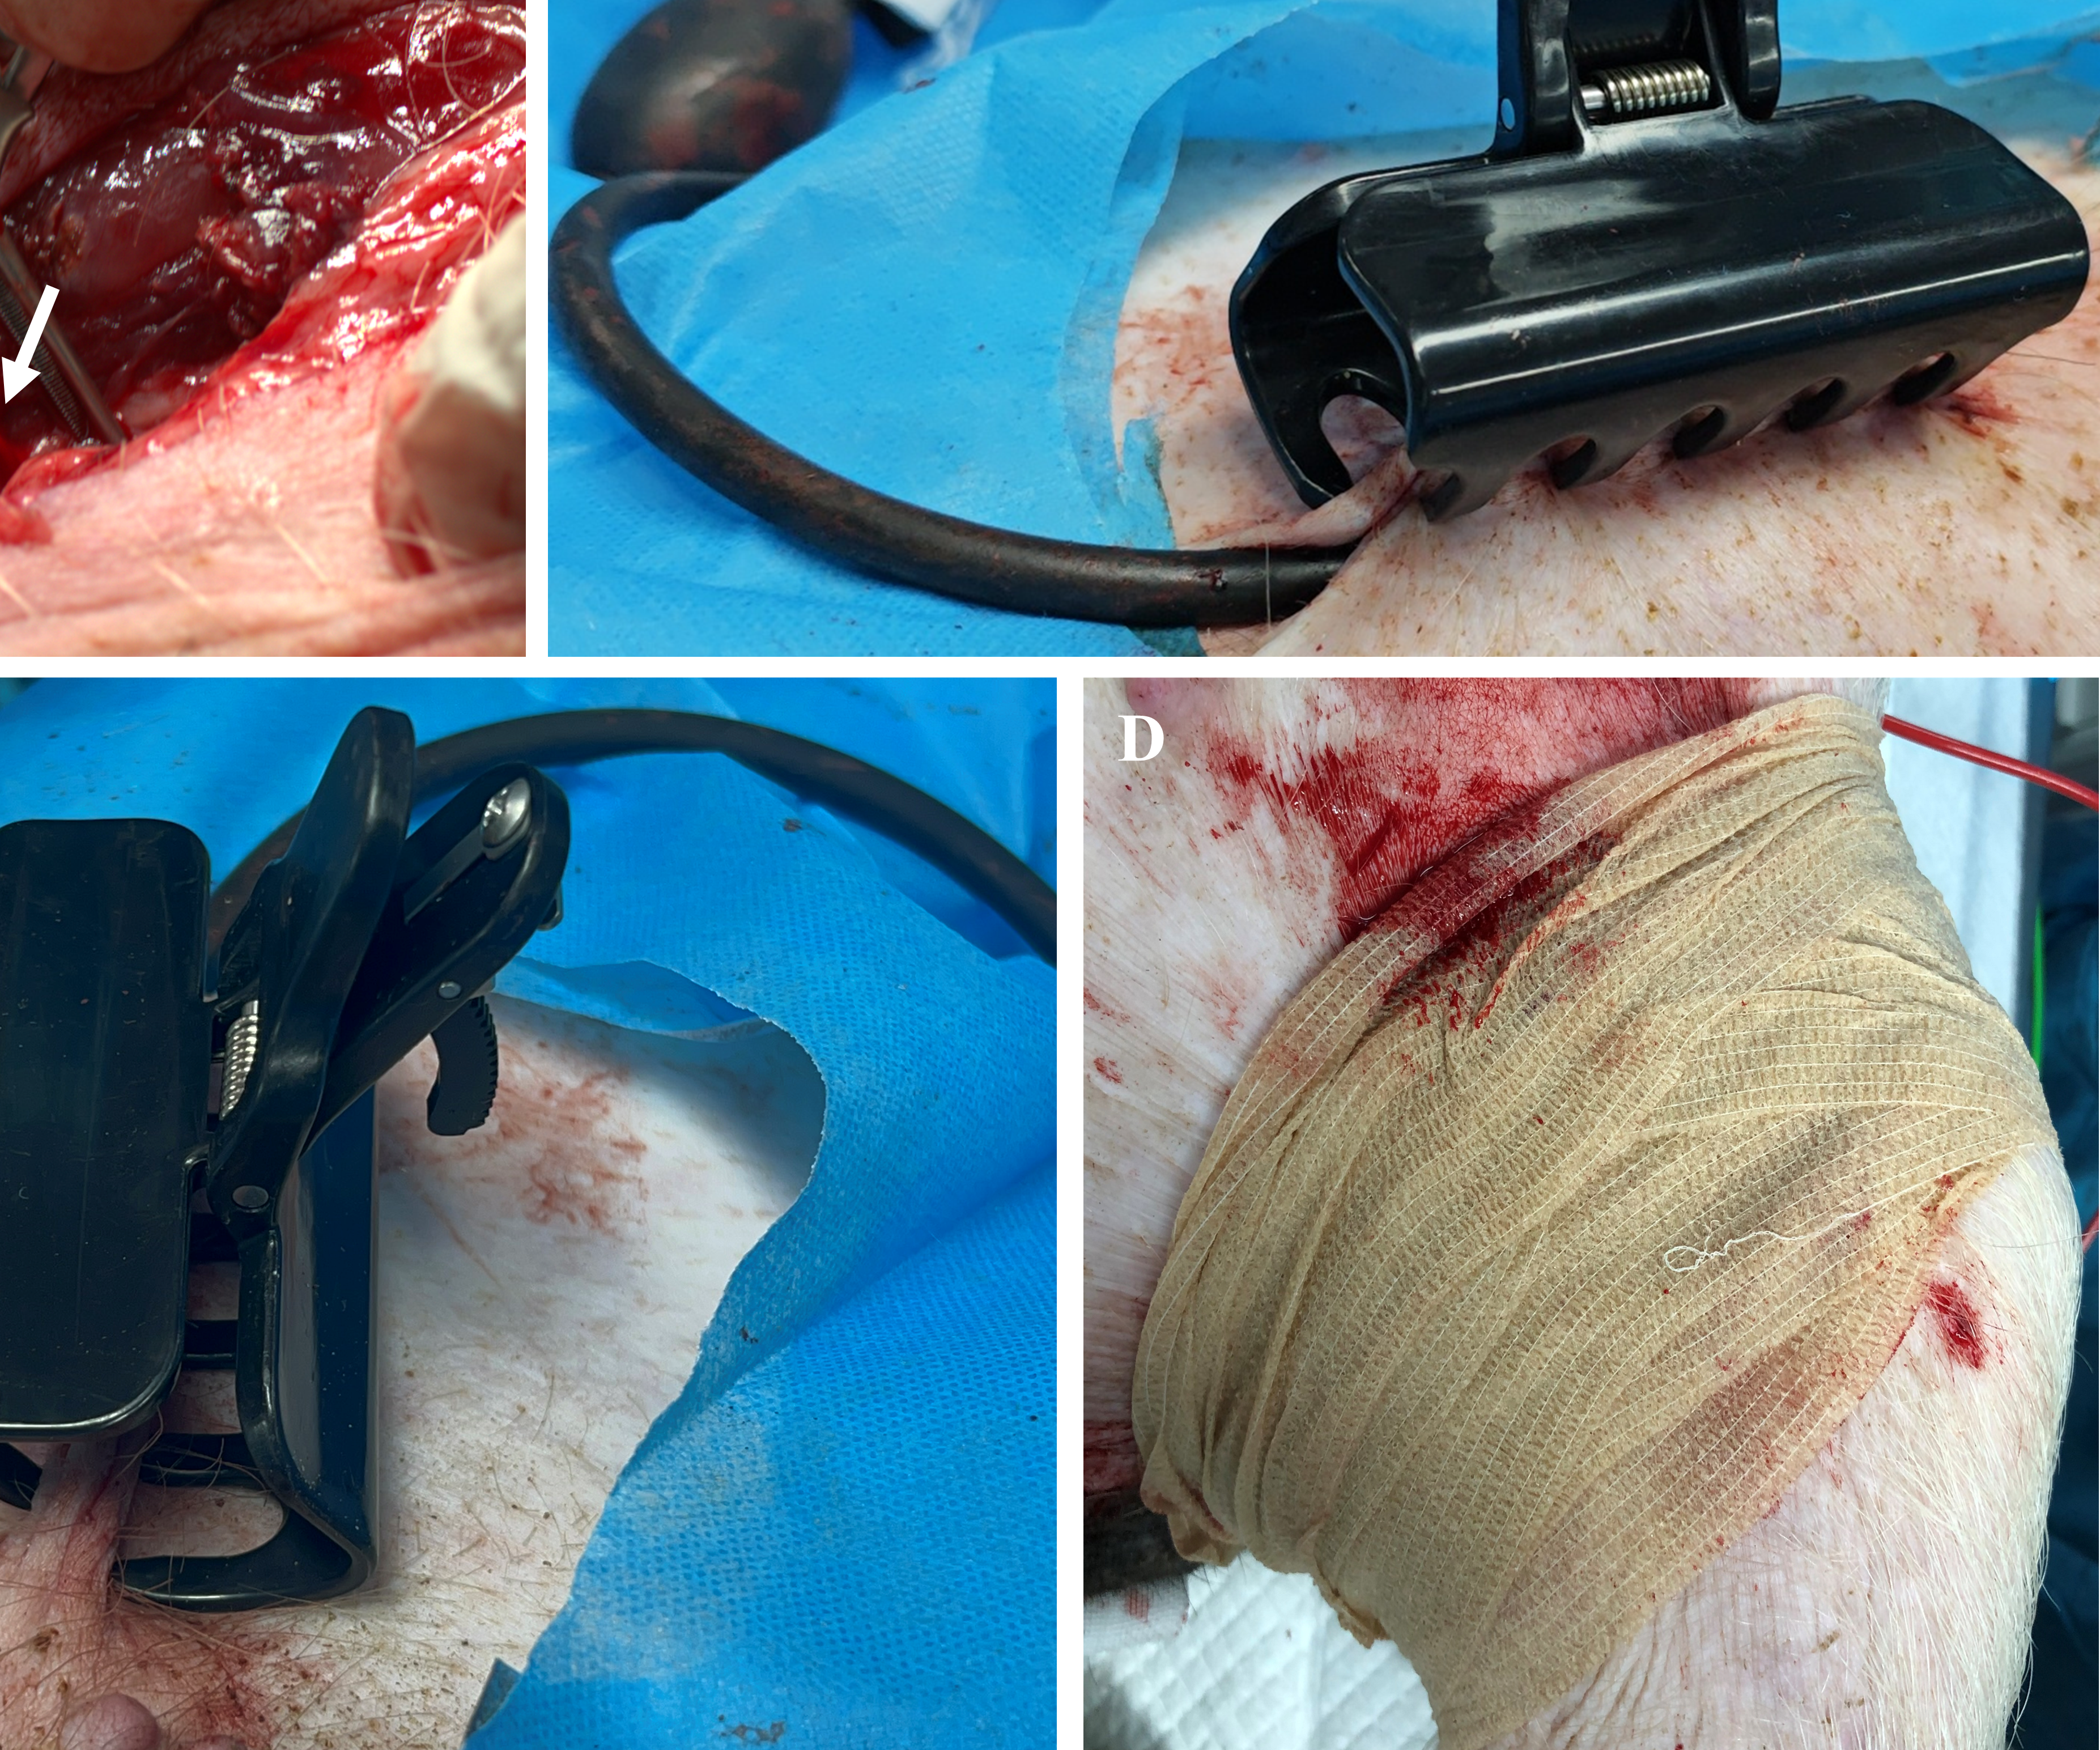


Figure 1 Establishment and management of a model for massive hemorrhage at the groin junction. (A) Free bleeding is visible after arterial incision (arrow); (B, C) Experimental group: A hemostatic clip is used to control bleeding from the groin injury, securely fixed to the skin at the edge of the wound, serving to close the wound; (D) Control group: Elastic bandages are wrapped several times with pressure to bandage and control bleeding at the groin area.

Within five minutes after hemostatic procedure, if the hemostatic clamps or bandages were not firmly fixed or become loose, they were allowed to perform no more than three operations. After that, no more hemostatic interventions were conducted, regardless of whether bleeding or not. The hip joint was fully extended and flexed five times to assess the impact of joint movement on the stability of the hemostatic device. Animals were monitored under anesthesia for 180 minutes or until death. Subsequently, the hemostatic device was removed. For those animals that survived more than 180 minutes, euthanasia was conducted via intravenous administration of a high concentration of potassium chloride during deep anesthesia. The experimental procedures for both groups were executed by the same team of personnel.

## Assessment and Data Collection

The number of animals that survived to 180 minutes in both groups was documented, and the survival rate was calculated. The precise survival time was recorded if an animal did not survive to 180 minutes. Additionally, the time required to complete hemostatic procedure was measured and the blood collected in the suction device, as well as the blood-soaked urine pads, gauze and any blood clots extracted from the wound post-experiment was weighed. The dry weight of the urine pads and gauze was subtracted to ascertain the total blood loss. An electrocardiogram monitor was utilized to continuously monitor and record blood pressure and heart rate and a pulse oximeter was affixed to the tail to measure blood oxygen saturation throughout the duration of the experiment. Data were recorded at 15-minute interval during the initial 60 minutes following the experiment, and at 60-minute interval from 60 minutes to 180 minutes or until death. Before modeling, 1 hour after the experiment and after removing the hemostatic devices, ultrasound imaging was employed to assess the perfusion of the distal femoral artery, while skin surrounding the wound was examined to evaluate any potential additional damage caused by hemostatic devices. Following euthanasia, the injured femoral artery was collected for hematoxylin-eosin (HE) staining and analyzed by professionals in a blinded manner. Histological examination was completed by a separate pathologist who was blinded to the treatment groups.

## Statistical Analysis

Continuous variables were represented by mean and standard deviation or median and interquartile range, and analyzed by t-test or Mann-Whitney U test (Wilcoxon rank-sum test). Categorical variables were represented by counts and percentages (%), and analyzed by Fisher's exact probability method. Data were analyzed using IBM SPSS Statistics 27, with P<0.05 considered statistically significant.

## Detail of Hemostatic Clamp (including components and materials)

This hemostatic clamp is an innovative hemostatic device designed to apply at the junction of torso and trunk, making it suitable for first aid in pre-hospital trauma situations. It is primarily composed of clamp bodies, a clamping force adjusting device, sharp needles and protective sleeves for needles. Among them, the clamping force adjustment device consists of a torsion spring, elastic plate, pressure tooth, screw, round pin, and clamp head (including adjustment teeth). The clamp body is injection molded from polycarbonate/acrylonitrile-butadiene-styrene (PC/ABS) copolymer mixture. The torsion spring, elastic plate, pressure tooth, screw, round pin, and sharp needle are made of stainless steel. The needle protective sheath is composed of silicone or plastic material. The device is securely fixed on the skin by sharp needles, drawing the skin together to temporarily close the open wound. The clamping force adjusting device can freely adjust the opening angle of the clamp body and prevent inadvertent release. The integrated pressuring airbag works synergistically with the hematoma in wound to mitigate hemorrhage by applying pressure (Figure 2).


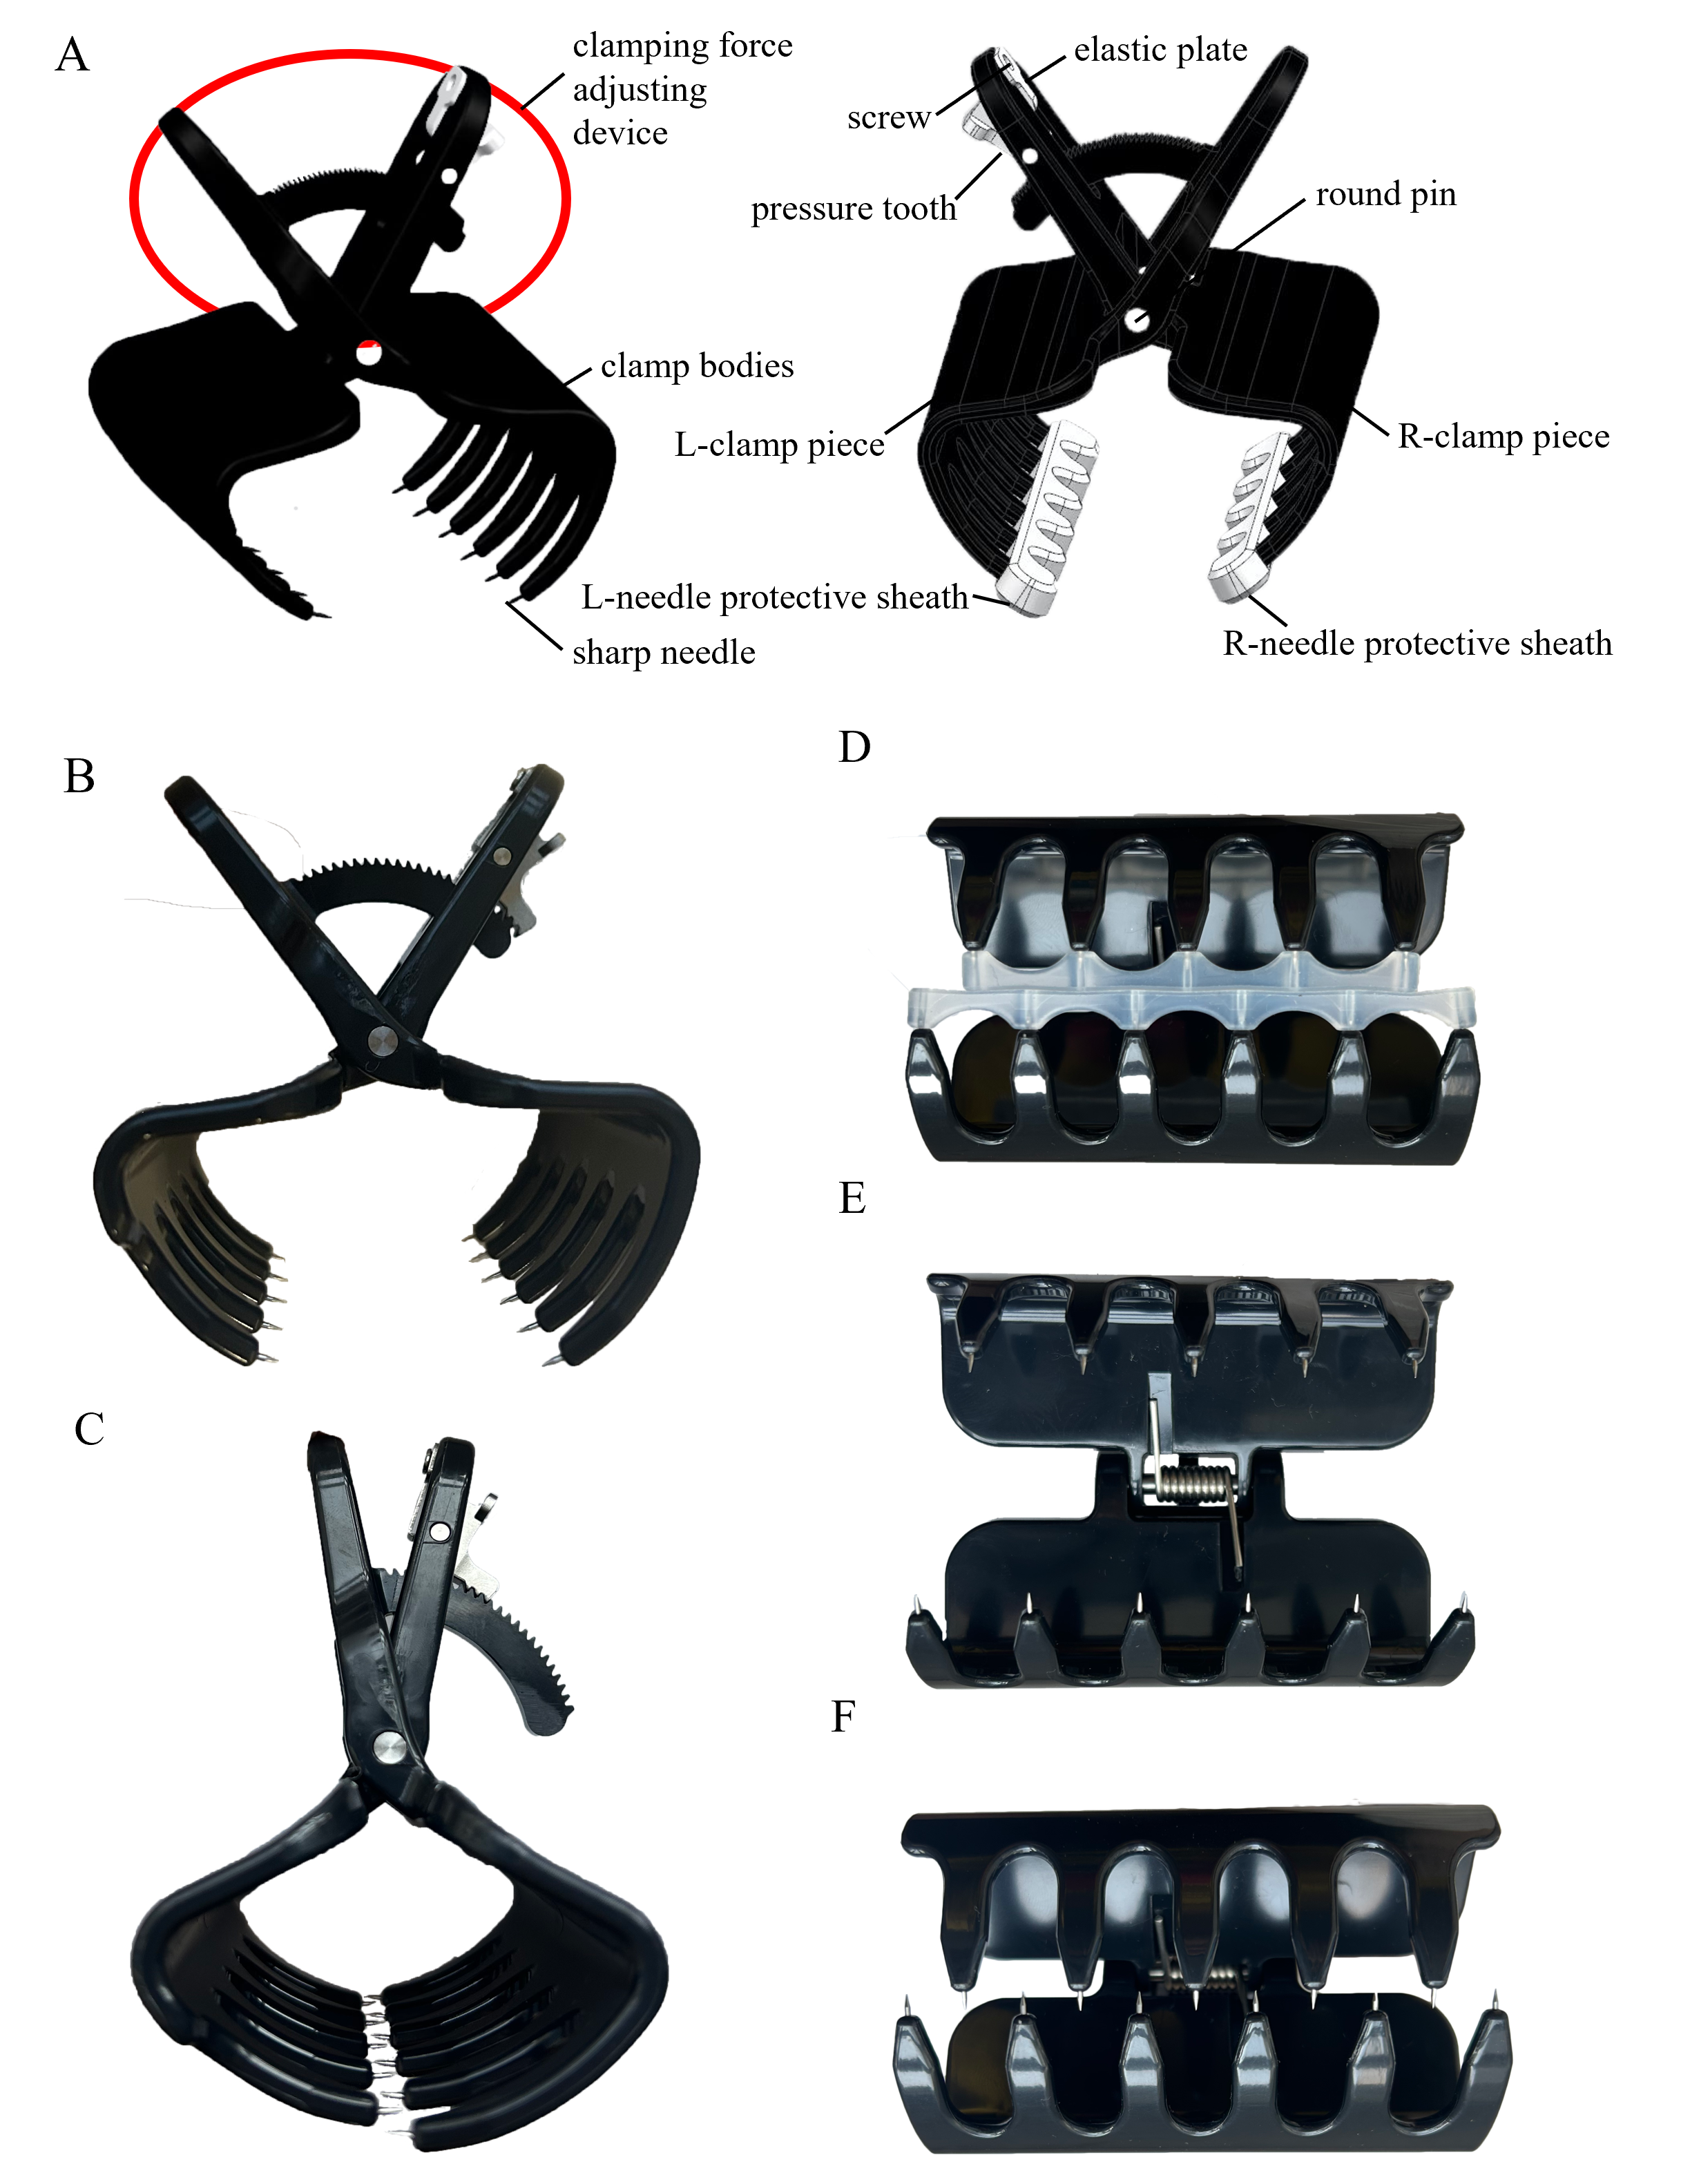


Figure 2 Composition and appearance of the hemostatic clamp. (A) Schematic diagram of the structure of the hemostatic clamp; (B) Side view when open; (C) Side view when clamped; (D)Bottom view with a sharp needle protective cover when clamped; (E) Bottom view when open; (F) Bottom view when clamped.

# Results

This research aims to evaluate the efficacy of hemostatic clamps in managing groin hemorrhage in swine model by comparing it with conventional elastic bandages. As indicated in Table 1, the survival rates of experimental group and control group were 100% and 60%, respectively. All animals in experimental group survived for more than 180 minutes, and the median survival time and interquartile range of control group were 180 and 68 minutes. No significant differences were observed in survival rates and survival durations between two groups (P > 0.05). The hemostatic operation time of experimental and control group was 22.50 ± 2.89 s and 57.25 ± 13.60 s, respectively. Blood loss was 190 ± 100 g and 549 ± 195 g, respectively. The hemostatic clamps significantly reduced the hemostatic operation time and blood loss (p < 0.05).

Table 1 Comparison of survival rates, survival times, hemostatic operation times and blood loss between the experimental group and the control group.

|  | Survival rates（%） | Survival times（min） | Hemostatic operation times（s）* | Blood loss（g）* |
| --- | --- | --- | --- | --- |
| Experimental Group | 100 | > 180 | 22.50±2.89 | 190±100 |
| Control Group | 60 | 180, 68 | 57.25±13.60 | 549±195 |

（*，p＜0.05）

Before modeling, the vital signs of both groups were within normal range and did not exhibit any significantly statistical differences, thus animals in both groups were permitted for subsequent experiments. Once experiment began, alterations were observed in the blood pressure, heart rate and blood oxygen saturation levels in both groups. Notably, the systolic blood pressure in experimental group was consistently elevated compared to that of control group, with significantly statistical differences recorded at 15, 60, 120 and 180 minutes. Similarly, the diastolic blood pressure in experimental group was consistently higher than that of control group, with significantly statistical differences recorded at 15, 30, 45, 60, 120 and 180 minutes. The heart rate of control group was higher than that of experimental group except 180 minutes, but the difference was not statistically significant. The blood oxygen saturation in experimental group was consistently higher than that of control group, with significantly statistical differences recorded at 120 and 180 minutes (Figure 3). These findings suggested that the application of hemostatic clamp can help maintain blood pressure and blood oxygen saturation, thereby contributing to the stability of vital signs.


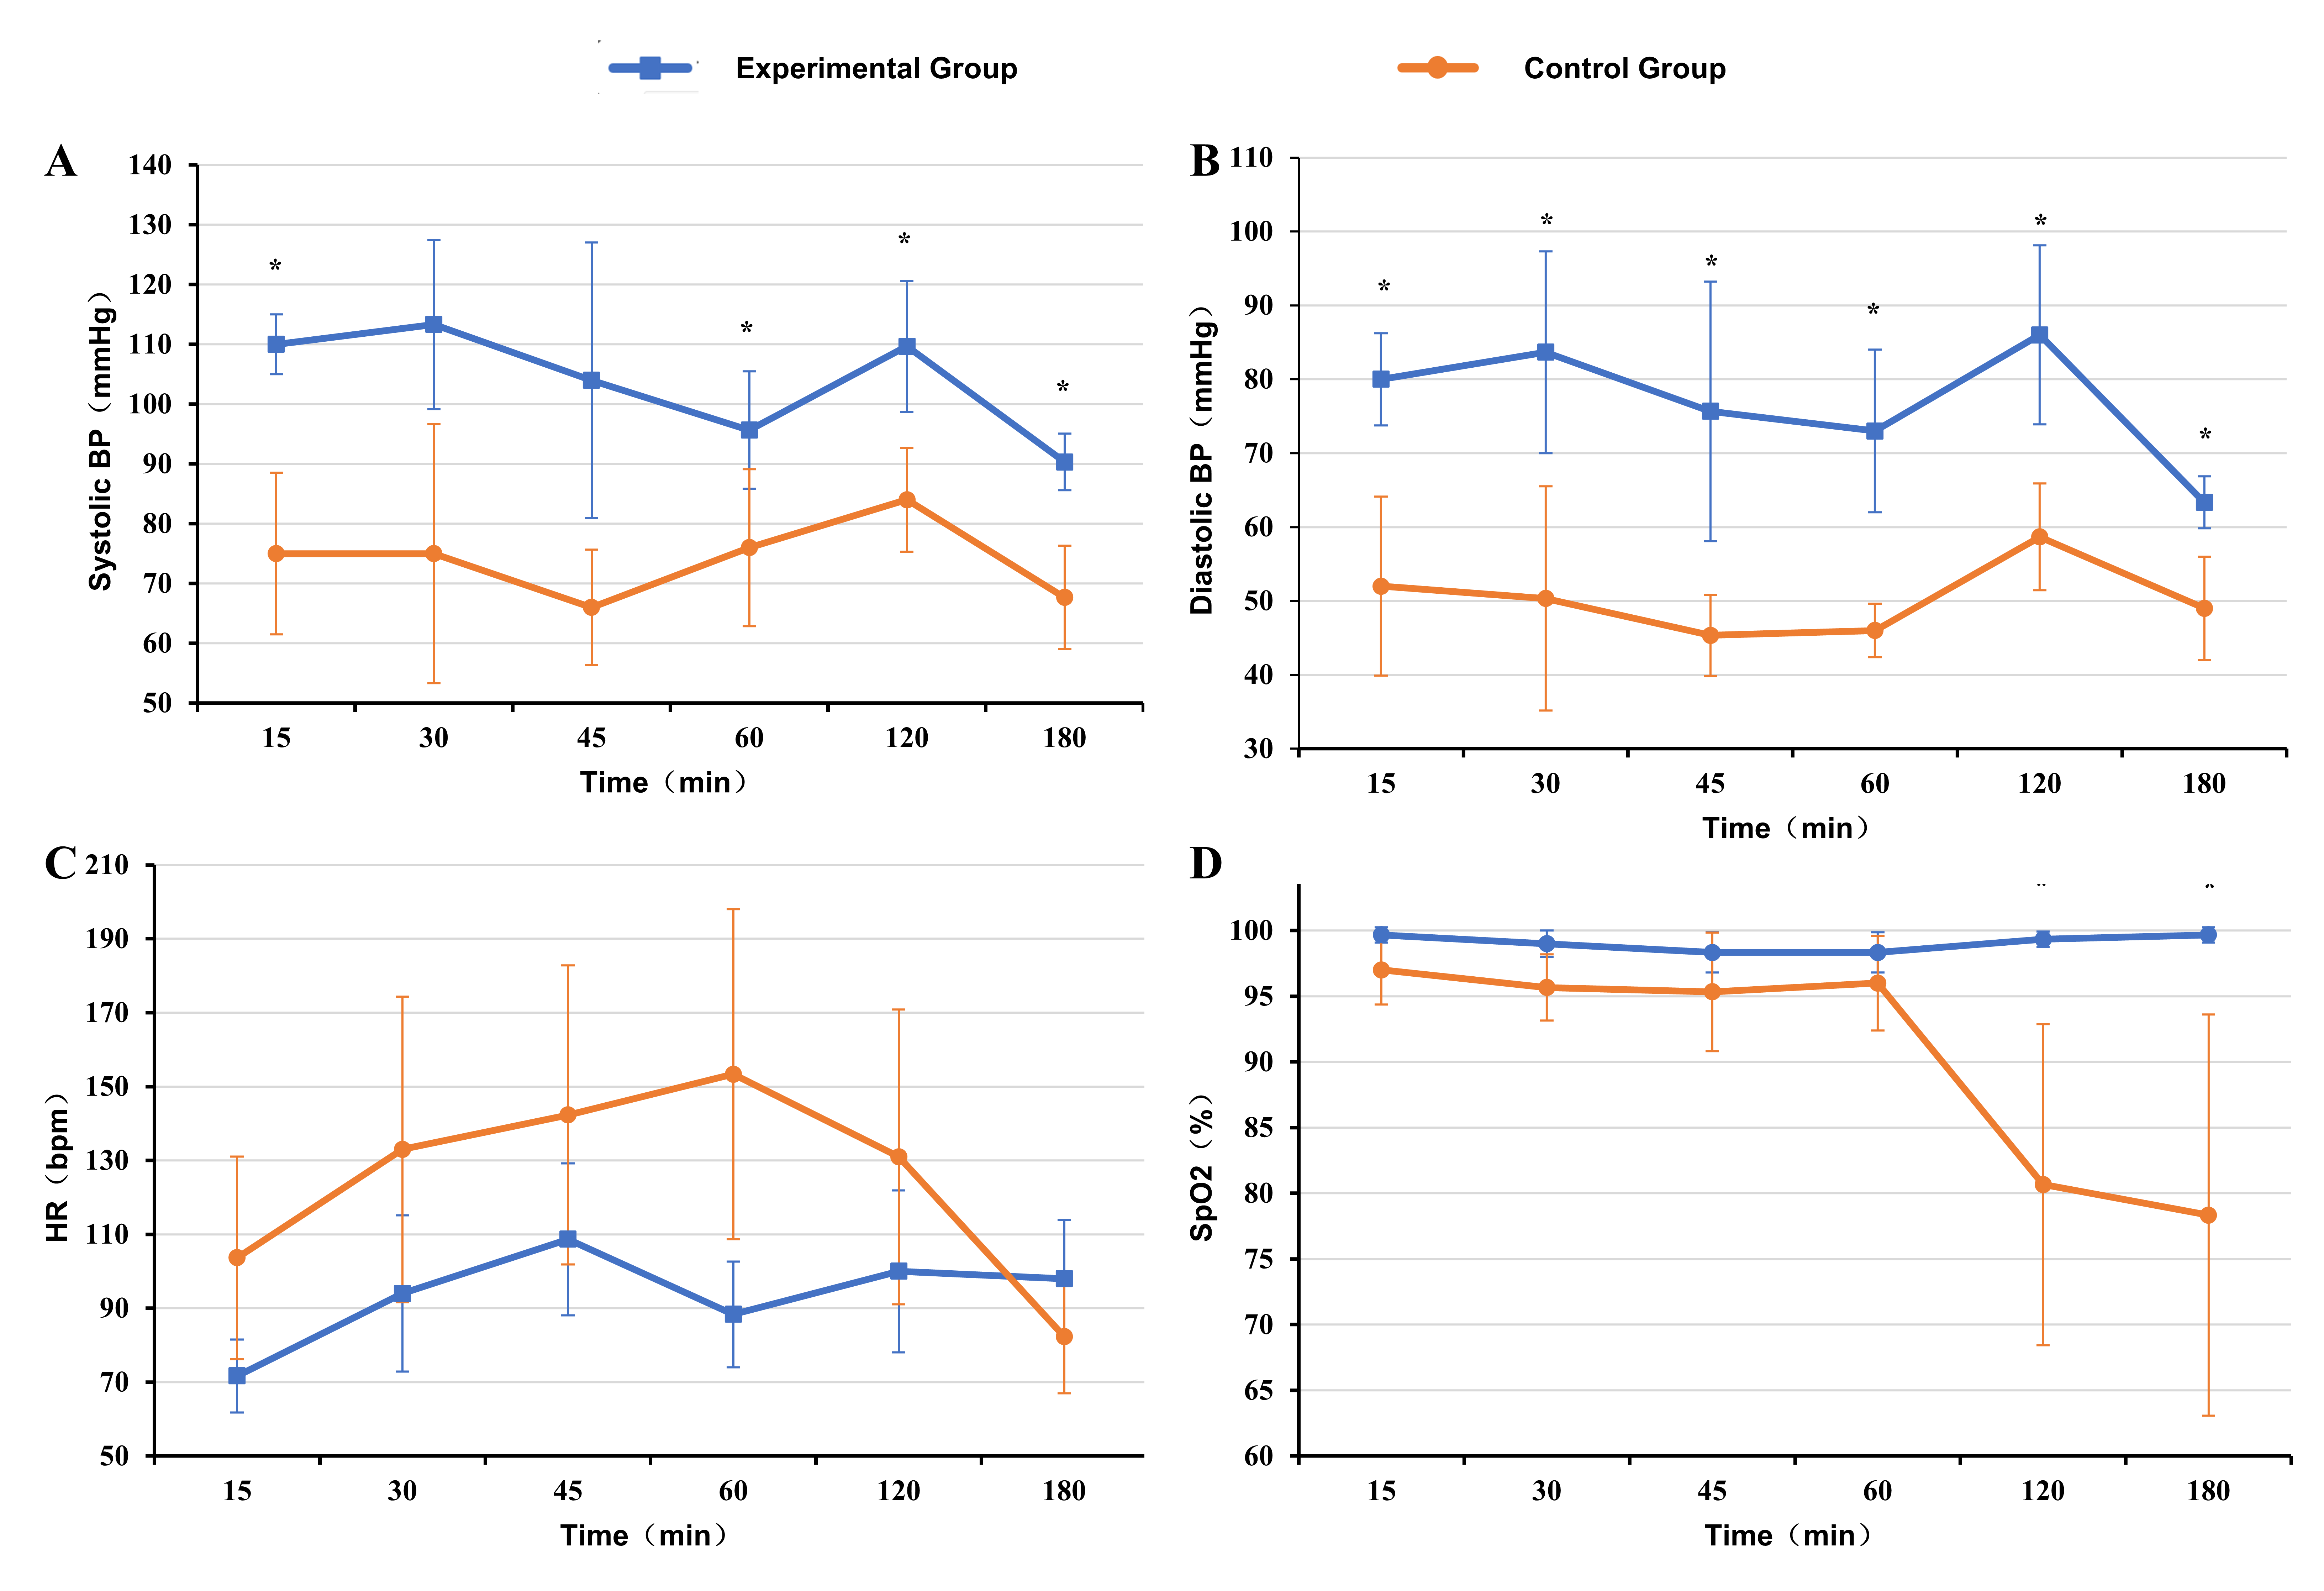


Figure 3 Changes in physiological parameters of survivors in the two groups during the experiment (mean ± standard deviation). (A) The systolic blood pressure of the experimental group was consistently higher than that of the control group, with significantly statistical differences at 15, 60, 120 and 180 minutes after the start of the experiment; (B) The diastolic blood pressure of the experimental group was consistently higher than that of the control group, with significantly statistical differences at each time point; (C) There were no significantly statistical differences in heart rate between the two groups at any time point; (D) The blood oxygen saturation of the experimental group was consistently higher than that of the control group, with significantly statistical differences at 120 and 180 minutes.

Ultrasound was utilized to assess the perfusion of distal blood vessels. The distal blood vessels of experimental group exhibited normal blood flow perfusion before modeling. About an hour after applying the hemostatic clamp, the distal blood flow became almost undetectable. After releasing the hemostatic clamp at the end of the experiment, distal blood flow recovered, but decreased compared with baseline (Figure 4 A-C). Similarly, the distal blood vessels of control group exhibited normal blood flow perfusion before modeling. About an hour after applying bandages, although the distal blood flow decreased, some residual perfusion remained. After removing the bandages at the end of the experiment, distal blood flow perfusion increased slightly compared to the one-hour mark, but was still reduced compared to baseline (Figure 4 D-F).


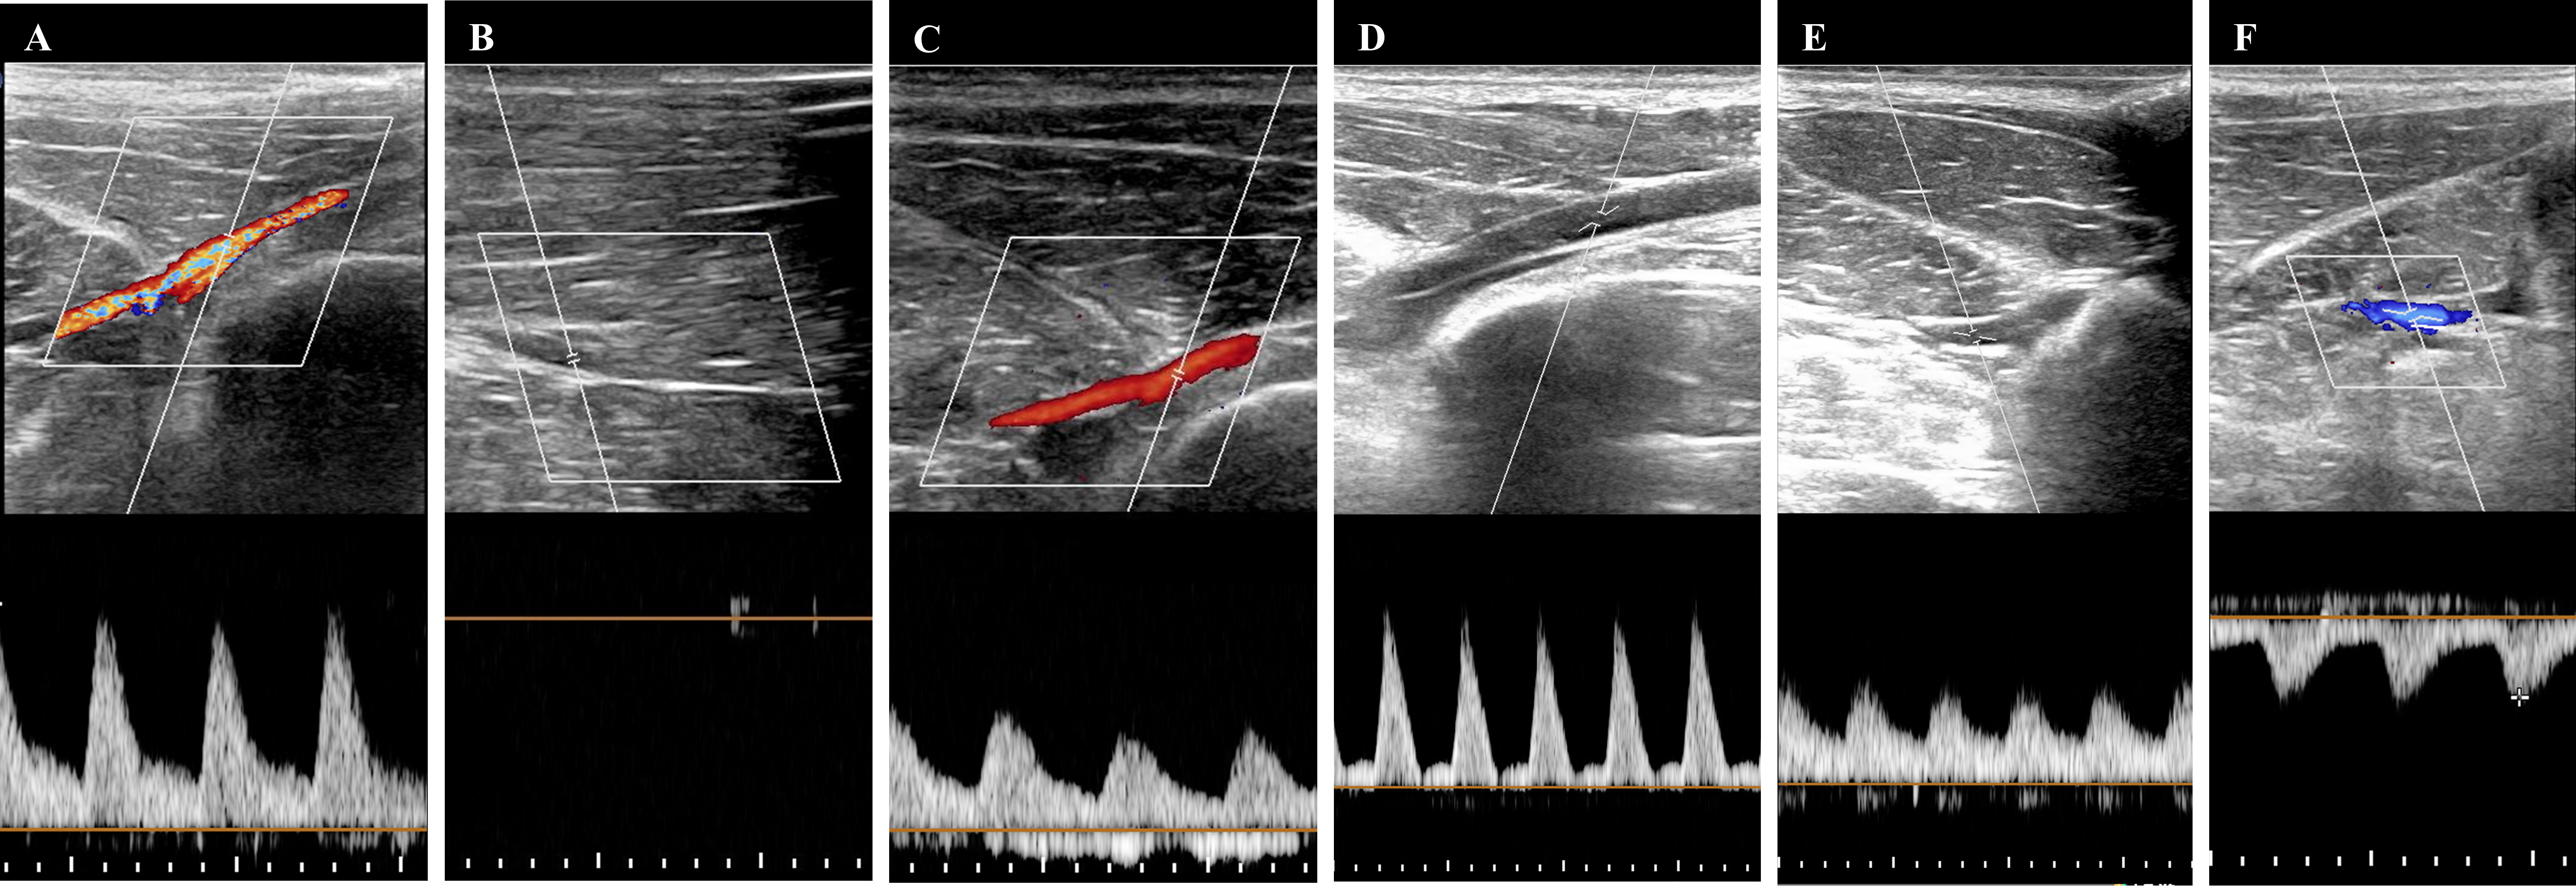


Figure 4 Ultrasound observation of distal arterial blood flow in the experimental group (A-C) and the control group (D-F). (A) Blood flow is smooth before modeling; (B) After applying a hemostatic clamp for about 1 hour, blood flow is significantly reduced, and ultrasound can hardly detect it; (C) After releasing the hemostatic clamp for 3 hours, blood flow increases, but is still lower than the initial level. (D) Blood flow is smooth before modeling; (E) After applying bandages for about 1 hour, blood flow decreases, but perfusion is still present; (F) Blood flow increases after releasing the bandages.

The flexion and extension movements of the joints had little impact on the stability and hemostatic efficacy of the hemostatic clamp in experimental group and the clamp remained stably fixed at the injury site without loosening. In control group, bandages were loose compared with their pre-activity state. After experiment, the skin surrounding the wound was examined. No changes such as redness, swelling, bleeding, or blistering were observed. Hematoxylin and eosin (HE) staining of the femoral artery indicated that no significant inflammation, fibrosis, or degeneration of myocytes was observed in both groups . Notably, intraluminal thrombosis was visible in experimental group, while the control group showed only a small amount of residual red blood cells in the lumen without apparent thrombosis (Figure 5).

Figure 5 HE staining of the femoral artery lumen. (A) In the experimental group, thrombus formation is observed in the femoral artery (scale bar = 200 μm); (B) In the control group, no thrombus formation is observed in the femoral artery (scale bar = 100 μm).

# Discussion

Significant hemorrhage has always been a leading contributor to "preventable death" after severe traumatic injuries (2, 29, 30). The mortality resulting from bleeding in torso and junctional regions surpasses that associated with limb injuries (3). Consequently, it is crucial to strengthen early control and management of hemorrhage, whether in military or civilian settings, which is beneficial for saving lives in pre-hospital environments, particularly when uncontrolled junctional bleeding occurs. In response to this situation, various new hemostatic products and techniques have been developed and introduced globally, and their hemostatic efficacy has been extensively studied (21-25, 27). In contrast, the current emergency hemostatic products and techniques in developing countries are still traditional and limited, lacking specialized devices to deal with torso and junctional bleeding, with research in this area also lagging behind. In response to this gap, our study has independently designed and developed a hemostatic clamp that can temporarily close wounds and apply pressure to bleeding sites to stop bleeding. It is designed to control bleeding within tens of seconds in pre-hospital setting, providing critical time for rescue after admission. This study evaluated the efficacy of this hemostatic device in managing early massive bleeding through groin hemorrhage of swine model.

Although no significant differences were observed in survival rates and survival times between the two groups, possibly due to the limited sample size, the hemostatic clip still demonstrated certain advantages in improving survival rates and extending survival times. Compared to traditional bandage dressing, the hemostatic clamp helped shorten the hemostatic operation time and reduce blood loss significantly. The rapid completion of hemostatic operation correlates with improved treatment efficiency and reduced blood loss, which may subsequently decrease the risk of early hemorrhagic shock and late-stage death and complications in cases of mass injuries. The clamping force adjustment device can be simply adjusted to tighten the clamp body, thereby drawing the skin together and closing the wound. This operation can be quickly completed by one person in 10-20 seconds. In contrast, bandage dressing is difficult to perform by a single person and requires a longer operation time, as it involves lifting the injured limb or even the hip by one person and wrapping the bandage around the wound by another, which is both time-consuming and labor-intensive.

The groin area of both humans and pigs is not a regular cylinder but a proximal coarser and distal finer shape, with the anterior superior iliac spine protruding outwards. This anatomical structure not only makes it difficult for elastic bandages to be securely fixed around the groin, resulting in loosening and slipping towards the distal end, but also prevents them from effectively drawing the surrounding skin together to temporarily close the wound. Additionally, the pressure applied by the bandage is circumferential from the outside in, rather than precise local pressurization, thereby diminishing its ability to compress and stop bleeding, which was confirmed through ultrasound observation of distal blood perfusion. The combined effect of these factors results in the poor hemostatic efficacy of elastic bandages.

Most patients die shortly after the onset of shock, and adequate fluid resuscitation is not effective in preventing hypothermia, acidosis and coagulation dysfunction resulting from massive blood loss. Survivors may also die at later stages due to sepsis and multiple organ dysfunction (31-34). Therefore, early and rapid control of bleeding to prevent the occurrence of hemorrhagic shock is crucial for reducing the risk of death and complications (4, 8, 35). Compared to control group, the experimental group displayed higher systolic blood pressure, diastolic blood pressure and blood oxygen saturation at different time points, suggesting the hemostatic clamp, compared to bandages, is more effective in sustaining stable early vital signs and preventing the occurrence of hemorrhagic shock, providing critical time for pre-hospital emergency treatment and patient transfer.

There is a limitation that this study did not compare the hemostatic clamp with the commercially available iTClamp. As a preclinical animal experiment focusing on domestic device innovation, the primary objective was to validate the hemostatic potential, safety, feasibility, and preliminary efficacy of the self-developed hemostatic clamp, addressing the critical shortage of emergency medical devices. By comparing it with traditional bandages, it has been proven that it has breakthrough advantages in key indicators such as operational efficiency, hemostatic effect, and stability, providing original data support for domestic hemostatic equipment. The hemostatic clamp uses a triple mechanism of sharp needle fixation + airbag compression + wound closure, filling the gap in domestic dedicated hemostatic equipment for the junctional area. The development of medical devices usually follows a progressive path from basic verification to animal experiments to multi-center clinical trials. Our team has planned to conduct a randomized controlled trial (RCT) based on this study and combine it with more clinical and emergency situations to obtain more objective conclusions. The airbag serves as an auxiliary compression device. Placing the airbag between the gauze layers, the upper layer of gauze can protect the airbag from accidental puncture by the sharp needle. In the future, our team will develop an airbag with enhanced structural strength.

The groin injury hemorrhage model is a commonly used animal model for studying the efficacy of bleeding control, as it reflects the cavity defects associated with complex trauma more accurately (27, 28, 36). Common techniques for establishing injury hemorrhage models are mainly vascular transection and arterial incision. Although this study attempts to mimic the physiological conditions of patients with severe injury hemorrhage, the standardized operation of arterial injury cannot fully replicate complex real-world situations. The aim of this study is to initially evaluate the feasibility and efficacy of hemostatic clamp for controlling hemorrhage from major vascular injuries in the groin, thereby establishing a foundation for its prospective application in early management of trauma hemorrhage. Future research can be conducted in other injury sites, including compressible bleeding in the torso, scalp, limbs and other junctional areas, as well as models of penetrating injuries (9), coagulopathy (28). As no single hemostatic device is suitable for all hemorrhage situations, it is crucial to select the appropriate device based on the specific settings. In addition to researching new products and techniques, it is important to discover potential synergistic effects among different devices to achieve better treatment outcomes (37). Moreover, further research is needed to determine whether the use of the hemostatic clamp may result in complications such as ischemia-reperfusion injury and hyperkalemia.

# Conclusion

Compared to conventional elastic bandages, the hemostatic clamp developed independently in this study can compress the bleeding site together with the hematoma in wound and pressuring airbag, thereby promoting thrombosis, which serves to stop bleeding, reduce blood loss, sustain stable vital signs and prevent hemorrhagic shock. Additionally, it displays advantages such as simple and rapid operation, robust stability and no secondary injury. These features demonstrate its potential and value in controlling severe hemorrhage resulting from trauma and serious injuries, ultimately contributing to pre-hospital emergency care.

# Acknowledgments

This work was supported by National Key Research and Development Program of China (2022YFC3006200, 2022YFC3006204, 2022YFC3006205).

**Huijuan Fu:** Writing – original draft, Visualization, Validation, Methodology, Investigation, Conceptualization. **Ye Tang:** Writing – original draft, Visualization, Validation, Methodology, Investigation, Conceptualization. **Mingjian Bei:** Methodology, Investigation, Conceptualization, Resources. **Yangyang Wu**: Methodology, Investigation, Conceptualization, Resources. **Yehui Lu**: Methodology, Investigation, Conceptualization, Resources. **Yanhua Wang:** Resources, Investigation. **Liu Zhang:** Resources, Methodology, Conceptualization, Funding acquisition. **Dianying Zhang:** Writing – review & editing, Supervision, Funding acquisition, Conceptualization, Resources.

# References

Z. Du, Z. Wang, F. Guo and T. Wang: Dynamic structures and emerging trends in the management of major trauma: A bibliometric analysis of publications between 2012 and 2021. *Frontiers In Public Health* 10:1017817, 2022.

E. Cole, A. Weaver, L. Gall, A. West, D. Nevin, R. Tallach, B. O'Neill, S. Lahiri, S. Allard, N. Tai, R. Davenport, L. Green and K. Brohi: A Decade of Damage Control Resuscitation: New Transfusion Practice, New Survivors, New Directions. *Annals of Surgery* 273(6):1215-1220, 2021.

B. J. Eastridge, R. L. Mabry, P. Seguin, J. Cantrell, T. Tops, P. Uribe, O. Mallett, T. Zubko, L. Oetjen-Gerdes, T. E. Rasmussen, F. K. Butler, R. S. Kotwal, J. B. Holcomb, C. Wade, H. Champion, M. Lawnick, L. Moores and L. H. Blackbourne: Death on the battlefield (2001-2011): implications for the future of combat casualty care. *The Journal of Trauma and Acute Care Surgery* 73(6 Suppl 5):S431-S437, 2012.

J. W. Cannon: Hemorrhagic Shock. *The New England Journal of Medicine* 378(4):370-379, 2018.

A. Anonymous: Tactical Combat Casualty Care (TCCC) Guidelines for Medical Personnel 15 December 2021. *Journal of Special Operations Medicine : a Peer Reviewed Journal For SOF Medical Professionals* 22(1):11-17, 2022.

J. Zhou, M. Li, J. Chang, B. Chen, T. Wang, W. Guo and Y. Wang: Kaolin loaded gelatin sponges for rapid and effective hemostasis and accelerated wound healing. *Journal of Biomaterials Science. Polymer Edition* 35(7):1064-1085, 2024.

A. A. Smith, J. E. Ochoa, S. Wong, S. Beatty, J. Elder, C. Guidry, P. McGrew, C. McGinness, J. Duchesne and R. Schroll: Prehospital tourniquet use in penetrating extremity trauma: Decreased blood transfusions and limb complications. *The Journal of Trauma and Acute Care Surgery* 86(1):43-51, 2019.

R. Schroll, A. Smith, K. Alabaster, T. J. Schroeppel, Z. E. Stillman, E. J. Teicher, E. Lita, P. Ferrada, J. Han, R. D. Fullerton, A. G. McNickle, D. R. Fraser, M. S. Truitt, H. M. Grossman Verner, S. R. Todd, D. Turay, A. Pop, L. N. Godat, T. W. Costantini, D. Khor, K. Inaba, J. Bardes, A. Wilson, J. G. Myers, J. M. Haan, K. L. Lightwine, H. O. Berdel, A. J. Bottiggi, W. Dorlac, L. Zier, G. Chang, M. Lindner, B. Martinez, D. Tatum, P. E. Fischer, M. Lieser, R. C. Mabe, L. Lottenberg, C. G. Velopoulos, S. Urban, M. Duke, A. Brown, M. Peckham, A. Gongola, T. M. Enniss, P. Teixeira, D. Y. Kim, G. Singer, P. Ekeh, C. Hardman, R. Askari, B. Okafor and J. Duchesne: AAST multicenter prospective analysis of prehospital tourniquet use for extremity trauma. *The Journal of Trauma and Acute Care Surgery* 92(6), 2022.

L. F. Littlejohn, J. J. Devlin, S. S. Kircher, R. Lueken, M. R. Melia and A. S. Johnson: Comparison of Celox-A, ChitoFlex, WoundStat, and combat gauze hemostatic agents versus standard gauze dressing in control of hemorrhage in a swine model of penetrating trauma. *Academic Emergency Medicine : Official Journal of the Society For Academic Emergency Medicine* 18(4):340-350, 2011.

J. M. Watters, P. Y. Van, G. J. Hamilton, C. Sambasivan, J. A. Differding and M. A. Schreiber: Advanced hemostatic dressings are not superior to gauze for care under fire scenarios. *The Journal of Trauma* 70(6):1413-1419, 2011.

P. Rhee, C. Brown, M. Martin, A. Salim, D. Plurad, D. Green, L. Chambers, D. Demetriades, G. Velmahos and H. Alam: QuikClot use in trauma for hemorrhage control: case series of 103 documented uses. *The Journal of Trauma* 64(4):1093-1099, 2008.

B. Kheirabadi: Evaluation of topical hemostatic agents for combat wound treatment. *U.S. Army Medical Department Journal*:25-37, 2011.

B. S. Kheirabadi, J. W. Edens, I. B. Terrazas, J. S. Estep, H. G. Klemcke, M. A. Dubick and J. B. Holcomb: Comparison of new hemostatic granules/powders with currently deployed hemostatic products in a lethal model of extremity arterial hemorrhage in swine. *The Journal of Trauma* 66(2), 2009.

J. McManus, T. Hurtado, A. Pusateri and K. J. Knoop: A case series describing thermal injury resulting from zeolite use for hemorrhage control in combat operations. *Prehospital Emergency Care* 11(1):67-71, 2007.

J. K. Wright, J. Kalns, E. A. Wolf, F. Traweek, S. Schwarz, C. K. Loeffler, W. Snyder, L. D. Yantis and J. Eggers: Thermal injury resulting from application of a granular mineral hemostatic agent. *The Journal of Trauma* 57(2):224-230, 2004.

I. Roberts, H. Shakur, T. Coats, B. Hunt, E. Balogun, L. Barnetson, L. Cook, T. Kawahara, P. Perel, D. Prieto-Merino, M. Ramos, J. Cairns and C. Guerriero: The CRASH-2 trial: a randomised controlled trial and economic evaluation of the effects of tranexamic acid on death, vascular occlusive events and transfusion requirement in bleeding trauma patients. *Health Technology Assessment (Winchester, England)* 17(10), 2013.

H. Shakur, I. Roberts, R. Bautista, J. Caballero, T. Coats, Y. Dewan, H. El-Sayed, T. Gogichaishvili, S. Gupta, J. Herrera, B. Hunt, P. Iribhogbe, M. Izurieta, H. Khamis, E. Komolafe, M.-A. Marrero, J. Mejía-Mantilla, J. Miranda, C. Morales, O. Olaomi, F. Olldashi, P. Perel, R. Peto, P. V. Ramana, R. R. Ravi and S. Yutthakasemsunt: Effects of tranexamic acid on death, vascular occlusive events, and blood transfusion in trauma patients with significant haemorrhage (CRASH-2): a randomised, placebo-controlled trial. *Lancet (London, England)* 376(9734):23-32, 2010.

I. Roberts, H. Shakur, A. Afolabi, K. Brohi, T. Coats, Y. Dewan, S. Gando, G. Guyatt, B. J. Hunt, C. Morales, P. Perel, D. Prieto-Merino and T. Woolley: The importance of early treatment with tranexamic acid in bleeding trauma patients: an exploratory analysis of the CRASH-2 randomised controlled trial. *Lancet (London, England)* 377(9771), 2011.

B. J. Eastridge, M. Hardin, J. Cantrell, L. Oetjen-Gerdes, T. Zubko, C. Mallak, C. E. Wade, J. Simmons, J. Mace, R. Mabry, R. Bolenbaucher and L. H. Blackbourne: Died of wounds on the battlefield: causation and implications for improving combat casualty care. *The Journal of Trauma* 71(1 Suppl):S4-S8, 2011.

A. Stannard, J. J. Morrison, D. J. Scott, R. A. Ivatury, J. D. Ross and T. E. Rasmussen: The epidemiology of noncompressible torso hemorrhage in the wars in Iraq and Afghanistan. *The Journal of Trauma and Acute Care Surgery* 74(3):830-834, 2013.

C. Handford and P. J. Parker: The Potential Use of the Abdominal Aortic Junctional Tourniquet® in a Military Population: A Review of Requirement, Effectiveness, and Usability. *Journal of Special Operations Medicine : a Peer Reviewed Journal For SOF Medical Professionals* 19(4):74-79, 2019.

E. A. Mann-Salinas, J. F. Kragh, M. A. Dubick, D. G. Baer and L. H. Blackbourne: Assessment of users to control simulated junctional hemorrhage with the combat ready clamp (CRoC™). *International Journal of Burns and Trauma* 3(1):49-54, 2013.

J. L. Gary, M. Kumaravel, K. Gates, A. R. Burgess, M. L. Routt, T. Welch, J. M. Podbielski, A. M. Beeler and J. B. Holcomb: Imaging comparison of pelvic ring disruption and injury reduction with use of the junctional emergency treatment tool for preinjury and postinjury pelvic dimensions: a cadaveric study with computed tomography. *Journal of Special Operations Medicine : a Peer Reviewed Journal For SOF Medical Professionals* 14(4):30-34, 2014.

J. E. Johnson, K. Sims, D. J. Hamilton and J. F. Kragh: Safety and Effectiveness Evidence of SAM(r) Junctional Tourniquet to Control Inguinal Hemorrhage in a Perfused Cadaver Model. *Journal of Special Operations Medicine : a Peer Reviewed Journal For SOF Medical Professionals* 14(2):21-25, 2014.

K. Mottet, D. Filips, S. Logsetty and I. Atkinson: Evaluation of the iTClamp 50 in a human cadaver model of severe compressible bleeding. *The Journal of Trauma and Acute Care Surgery* 76(3):791-797, 2014.

N. Percie du Sert, V. Hurst, A. Ahluwalia, S. Alam, M. T. Avey, M. Baker, W. J. Browne, A. Clark, I. C. Cuthill, U. Dirnagl, M. Emerson, P. Garner, S. T. Holgate, D. W. Howells, N. A. Karp, S. E. Lazic, K. Lidster, C. J. MacCallum, M. Macleod, E. J. Pearl, O. H. Petersen, F. Rawle, P. Reynolds, K. Rooney, E. S. Sena, S. D. Silberberg, T. Steckler and H. Würbel: The ARRIVE guidelines 2.0: Updated guidelines for reporting animal research. *PLoS Biology* 18(7):e3000410, 2020.

D. Filips, S. Logsetty, J. Tan, I. Atkinson and K. Mottet: The iTClamp controls junctional bleeding in a lethal swine exsanguination model. *Prehospital Emergency Care* 17(4):526-532, 2013.

K. A. Gerling, A. J. Kersey, A. L. Lauria, J. A. Mares, J. D. Hutzler, P. W. White, B. Abel, D. M. Burmeister, B. Propper and J. M. White: Evaluation of novel hemostatic agents in a coagulopathic swine model of junctional hemorrhage. *The Journal of Trauma and Acute Care Surgery* 95(2S Suppl 1):S144-S151, 2023.

X. Zhao, H. Xue, C. Fu, S. Li, Z. Wang, Z. Xiao, J. Ye, J. Cai, Y. Yang, Q. Zhao, F. Zhu, T. Wang and W. Huang: Incidence and risk factors for acute kidney injury after traumatic hemorrhagic shock: A 10-year retrospective cohort study. *Journal of Nephrology* 37(8):2337-2346, 2024.

X. Zhao, F. Guo, C. Wang, Z. Wang, P. Chang, H. Xue, T. Wang and F. Zhu: Characteristics and Risk Factors of Myocardial Injury after Traumatic Hemorrhagic Shock. *Journal of Clinical Medicine* 11(16), 2022.

M. Fröhlich, R. Lefering, C. Probst, T. Paffrath, M. M. Schneider, M. Maegele, S. G. Sakka, B. Bouillon and A. Wafaisade: Epidemiology and risk factors of multiple-organ failure after multiple trauma: an analysis of 31,154 patients from the TraumaRegister DGU. *The Journal of Trauma and Acute Care Surgery* 76(4), 2014.

A. Wafaisade, R. Lefering, B. Bouillon, S. G. Sakka, O. C. Thamm, T. Paffrath, E. Neugebauer and M. Maegele: Epidemiology and risk factors of sepsis after multiple trauma: an analysis of 29,829 patients from the Trauma Registry of the German Society for Trauma Surgery. *Critical Care Medicine* 39(4):621-628, 2011.

A. Sauaia, E. E. Moore, J. L. Johnson, T. L. Chin, A. Banerjee, J. L. Sperry, R. V. Maier and C. C. Burlew: Temporal trends of postinjury multiple-organ failure: still resource intensive, morbid, and lethal. *The Journal of Trauma and Acute Care Surgery* 76(3), 2014.

L. K. Kotarkonda, S. Bharathala, T. P. Sinha, K. D. Soni, R. Aggarwal, A. Selvi, D. N. Rao, A. Sharma and S. Bhoi: ALTERATION OF AKT1-GSK3Β SIGNALING PATHWAY IN TRAUMA HEMORRHAGIC SHOCK PATIENTS. *Shock (Augusta, Ga.)* 58(6):484-491, 2022.

A. C. Renaldo, H. Soudan, M. K. Gomez, A. S. Ganapathy, G. E. Cambronero, J. W. Patterson, M. R. Lane, G. D. Sanin, N. Patel, J. A. P. Niebler, J. E. Jordan, T. K. Williams, L. P. Neff and E. Rahbar: INVESTIGATING THE RELATIONSHIP BETWEEN BLEEDING, CLOTTING, AND COAGULOPATHY DURING AUTOMATED PARTIAL REBOA STRATEGIES IN A HIGHLY LETHAL PORCINE HEMORRHAGE MODEL. *Shock (Augusta, Ga.)* 62(2):265-274, 2024.

K. R. Ward, M. H. Tiba, W. H. Holbert, C. R. Blocher, G. T. Draucker, E. K. Proffitt, G. L. Bowlin, R. R. Ivatury and R. F. Diegelmann: Comparison of a new hemostatic agent to current combat hemostatic agents in a Swine model of lethal extremity arterial hemorrhage. *The Journal of Trauma* 63(2), 2007.

S. M. Stuart, G. Zarow, A. Walchak, J. McLean and P. Roszko: Pilot Study of a Novel Swine Model for Controlling Junctional Hemorrhage Using the iTClamp in Conjunction With Hemostatic Agents. *Military Medicine* 184(Suppl 1):367-373, 2019.
